# Supplementary material for: Static compliance and driving pressure are associated with ICU mortality in intubated COVID-19 ARDS
Source: Springer Nature journal article supplement (doi:10.1186/s13054-021-03667-6), 2021-07-28
Supplement: MOESM1 [file 19400130]

## ADDITIONAL FILE 1

**Title: Static compliance and driving pressure are associated with ICU mortality in intubated COVID-19 ARDS.**

**Authors:** Annalisa Boscolo<sup>1\*</sup> MD, Nicolò Sella<sup>2\*</sup> MD, Giulia Lorenzoni<sup>3</sup> PhD, Tommaso Pettenuzzo<sup>1</sup> MD, Laura Pasin<sup>1</sup> MD, Chiara Pretto<sup>2</sup> MD, Martina Tocco<sup>2</sup> MD, Enrico Tamburini<sup>2</sup> MD, Alessandro De Cassai<sup>1</sup> MD, Paolo Rosi<sup>4</sup> MD, Enrico Polati<sup>5</sup> MD, Katia Donadello<sup>5</sup> MD, Leonardo Gottin<sup>5</sup> MD, Silvia De Rosa<sup>6</sup> MD, Fabio Baratto<sup>7</sup> MD, Fabio Toffoletto<sup>8</sup> MD, V. Marco Ranieri<sup>9</sup> MD, Dario Gregori<sup>3</sup> PhD, Paolo Navalesi<sup>1,2</sup> MD, FERS, for the COVID-19 VENETO ICU Network<sup>o</sup>.

*\*These authors equally contributed to this work.*

*<sup>o</sup>Listed in the Acknowledgment section.*

**ADDITIONAL FILE 1. STROBE Statement-Checklist.**

|                           | <b>Item #</b> | <b>Recommendation</b>                                                                                                           | <b>Page #</b> |
|---------------------------|---------------|---------------------------------------------------------------------------------------------------------------------------------|---------------|
| <b>Title and abstract</b> | 1             | (a) Indicate the study's design with a commonly used term in the title or the abstract                                          | 1             |
|                           |               | (b) Provide in the abstract an informative and balanced summary of what was done and what was found                             | 1-2           |
| <b>Introduction</b>       |               |                                                                                                                                 |               |
| Background                | 2             | Explain the scientific background and rationale for the investigation being reported                                            | 3             |
| Objectives                | 3             | State specific objectives, including any prespecified hypotheses                                                                | 3             |
| <b>Methods</b>            |               |                                                                                                                                 |               |
| Study design              | 4             | Present key elements of study design early in the paper                                                                         | 3             |
| Setting                   | 5             | Describe the setting, locations, and relevant dates, including periods of recruitment, exposure, follow-up, and data collection | 4             |

|                              |    |                                                                                                                                                                                      |     |
|------------------------------|----|--------------------------------------------------------------------------------------------------------------------------------------------------------------------------------------|-----|
| Participants                 | 6  | (a) Give the eligibility criteria, and the sources and methods of selection of participants.<br><br>Describe methods of follow-up                                                    | 4   |
|                              |    | (b) For matched studies, give matching criteria and number of exposed and unexposed                                                                                                  | 4   |
| Variables                    | 7  | Clearly define all outcomes, exposures, predictors, potential confounders, and effect modifiers. Give diagnostic criteria, if applicable                                             | 3,4 |
| Data sources/<br>measurement | 8  | For each variable of interest, give sources of data and details of methods of assessment (measurement). Describe comparability of assessment methods if there is more than one group | 4   |
| Bias                         | 9  | Describe any efforts to address potential sources of bias                                                                                                                            | 4,5 |
| Study size                   | 10 | Explain how the study size was arrived at                                                                                                                                            | 4   |
| Quantitative<br>variables    | 11 | Explain how quantitative variables were handled in the analyses. If applicable, describe which groupings were chosen and why                                                         | 5   |
| Statistical<br>methods       | 12 | (a) Describe all statistical methods, including those used to control for confounding                                                                                                | 5,6 |

|  |                                                                     |     |
|--|---------------------------------------------------------------------|-----|
|  | (b) Describe any methods used to examine subgroups and interactions | 5,6 |
|  | (c) Explain how missing data were addressed                         | 5   |
|  | (d) If applicable, explain how loss to follow-up was addressed      | NA  |
|  | (e) Describe any sensitivity analyses                               | 5,6 |

## Results

|                  |    |                                                                                                                                                                                                   |           |
|------------------|----|---------------------------------------------------------------------------------------------------------------------------------------------------------------------------------------------------|-----------|
| Participants     | 13 | (a) Report numbers of individuals at each stage of study—eg numbers potentially eligible, examined for eligibility, confirmed eligible, included in the study, completing follow-up, and analysed | 6, Fig1   |
|                  |    | (b) Give reasons for non-participation at each stage                                                                                                                                              | 6, Fig1   |
|                  |    | (c) Consider use of a flow diagram                                                                                                                                                                | Fig1      |
| Descriptive data | 14 | (a) Give characteristics of study participants (eg demographic, clinical, social) and information on exposures and potential confounders                                                          | 6, Table1 |
|                  |    | (b) Indicate number of participants with missing data for each variable of interest                                                                                                               | NA        |

|                   |    |                                                                                                                                                                                                                                                                                                                                                                                                                       |           |
|-------------------|----|-----------------------------------------------------------------------------------------------------------------------------------------------------------------------------------------------------------------------------------------------------------------------------------------------------------------------------------------------------------------------------------------------------------------------|-----------|
|                   |    | (c) Summarise follow-up time (eg, average and total amount)                                                                                                                                                                                                                                                                                                                                                           | Table1    |
| Outcome data      | 15 | Report numbers of outcome events or summary measures over time                                                                                                                                                                                                                                                                                                                                                        | 6, Table1 |
| Main results      | 16 | (a) Give unadjusted estimates and, if applicable, confounder-adjusted estimates and their precision (eg, 95% confidence interval). Make clear which confounders were adjusted for and why they were included<br><br>(b) Report category boundaries when continuous variables were categorized<br><br>(c) If relevant, consider translating estimates of relative risk into absolute risk for a meaningful time period | 6,7       |
| Other analyses    | 17 | Report other analyses done—eg analyses of subgroups and interactions, and sensitivity analyses                                                                                                                                                                                                                                                                                                                        | 6,7       |
| <b>Discussion</b> |    |                                                                                                                                                                                                                                                                                                                                                                                                                       |           |
| Key results       | 18 | Summarise key results with reference to study objectives                                                                                                                                                                                                                                                                                                                                                              | 7         |

|                          |    |                                                                                                                                                                            |              |
|--------------------------|----|----------------------------------------------------------------------------------------------------------------------------------------------------------------------------|--------------|
| Limitations              | 19 | Discuss limitations of the study, taking into account sources of potential bias or imprecision.<br><br>Discuss both direction and magnitude of any potential bias          | 9,10         |
| Interpretation           | 20 | Give a cautious overall interpretation of results considering objectives, limitations, multiplicity of analyses, results from similar studies, and other relevant evidence | 7-9          |
| Generalisability         | 21 | Discuss the generalisability (external validity) of the study results                                                                                                      | 10           |
| <b>Other information</b> |    |                                                                                                                                                                            |              |
| Funding                  | 22 | Give the source of funding and the role of the funders for the present study and, if applicable, for the original study on which the present article is based              | Declarations |

### Reference.

von Elm E, Altman DG, Egger M, Pocock SJ, Gøtzsche PC, Vandenbroucke JP; STROBE Initiative. The Strengthening the Reporting of Observational Studies in Epidemiology (STROBE) statement: guidelines for reporting observational studies. *Epidemiology* 2007; 18(6):800-4
